# Supplementary material for: A specific gene expression program underlies antigen archiving by lymphatic endothelial cells in mammalian lymph nodes
Source: PubMed Central journal article supplement (PMC11661310; doi:10.21203/rs.3.rs-5493746/v1), 2024-12-10
Supplement: NIHPPRS5493746V1-supplement-1.pdf [file NIHPPRS5493746V1-supplement-1.pdf]

## Supplementary Files

This is a list of supplementary files associated with this preprint. Click to download.

- [Sheridanetalsupplementalfigures.pdf](#)
